# Supplementary material for: Chronic exposure to synthetic food colorant Allura Red AC promotes susceptibility to experimental colitis via intestinal serotonin in mice
Source: PubMed Central journal article supplement (PMC9768151; doi:10.1038/s41467-022-35309-y), 2022-12-20

1 **Supplementary Information**

2 *Chronic exposure to synthetic food colorant Allura Red AC promotes susceptibility to*  
3 *experimental colitis via intestinal serotonin in mice*

4 Yun Han Kwon<sup>1,2</sup>, Suhrid Banskota<sup>1,2</sup>, Huaqing Wang<sup>1,2</sup>, Laura Rossi<sup>2,3</sup>, Jensine A. Grondin<sup>1,2</sup>,  
5 Saad A. Syed<sup>2,3,4</sup>, Yeganeh Yousefi<sup>1,2</sup>, Jonathan D. Schertzer<sup>3,5</sup>, Katherine M. Morrison<sup>5,6</sup>,  
6 Michael G. Wade<sup>7</sup>, Alison C. Holloway<sup>5,8</sup>, Michael G. Surette<sup>2,3,4</sup>, Gregory R. Steinberg<sup>3,4,5</sup>, &  
7 Waliul I. Khan<sup>1,2,\*</sup>

8  
9 <sup>1</sup>Department of Pathology and Molecular Medicine, McMaster University; Hamilton, Ontario,  
10 Canada.

11 <sup>2</sup>Farncombe Family Digestive Health Research Institute, McMaster University; Hamilton, Ontario,  
12 Canada.

13 <sup>3</sup>Department of Biochemistry and Biomedical Sciences, McMaster University; Hamilton, Ontario,  
14 Canada.

15 <sup>4</sup>Department of Medicine, McMaster University; Hamilton, Ontario, Canada

16 <sup>5</sup>Center for Metabolism, Obesity, and Diabetes Research, McMaster University; Hamilton, Ontario,  
17 Canada.

18 <sup>6</sup>Department of Pediatrics, McMaster University; Hamilton, Ontario, Canada.

19 <sup>7</sup>Environmental Health, Science and Research Bureau, Health Canada; Ottawa, Ontario, Canada

20 <sup>8</sup>Department of Obstetrics and Gynecology, McMaster University; Hamilton, Canada.

21  
22 **\*Correspondence:** Waliul I. Khan, MBBS, PhD, FRCPath

23 E-mail: [khanwal@mcmaster.ca](mailto:khanwal@mcmaster.ca)

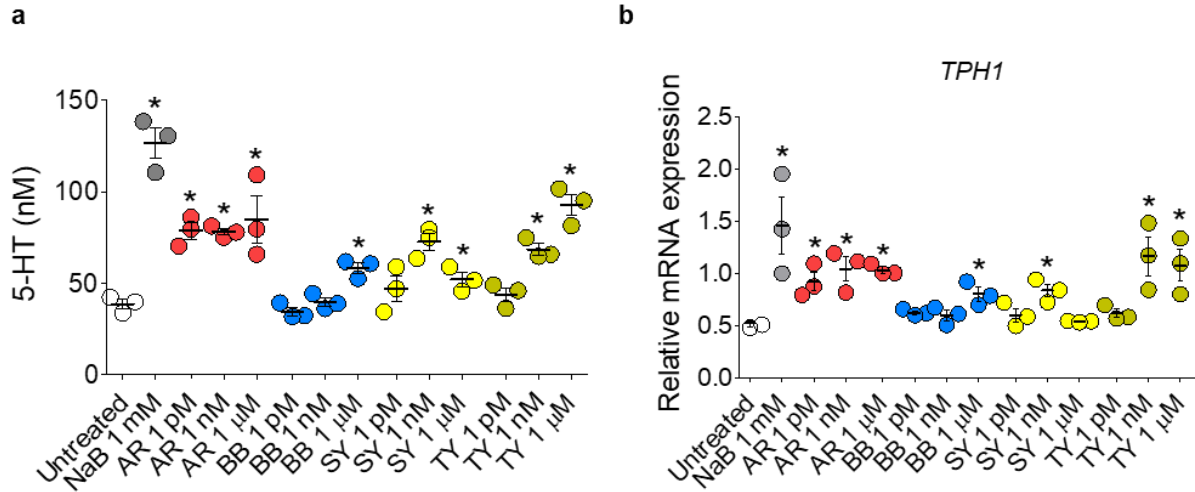

24

25 **Supplementary Figure 1. Synthetic colorants promote 5-HT secretion and induce *TPH1***  
 26 **mRNA expression in BON cells.** BON cells were treated for 24 hours with synthetic colorants at  
 27 three different concentrations (1 pmol L<sup>-1</sup>, 1 nmol L<sup>-1</sup>, and 1 μmol L<sup>-1</sup>). Sodium butyrate (NaB; 1  
 28 mmol L<sup>-1</sup>) was used as a positive control. **a** 5-HT levels in the culture supernatant, and **b** *TPH1*  
 29 mRNA levels. Data were analyzed by one-way ANOVA with *post hoc* Dunnett's test and are  
 30 expressed as mean ± SEM of 3 independent experiments (n = 3). Significance denoted by \*p <  
 31 0.05, where \*p < 0.05 versus Untreated. Source data are provided as a Source Data File.

a

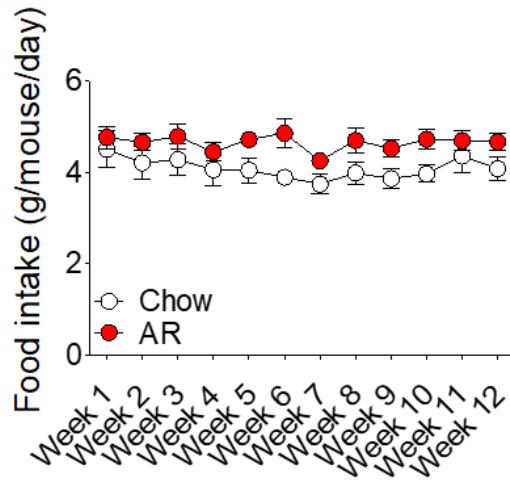

b

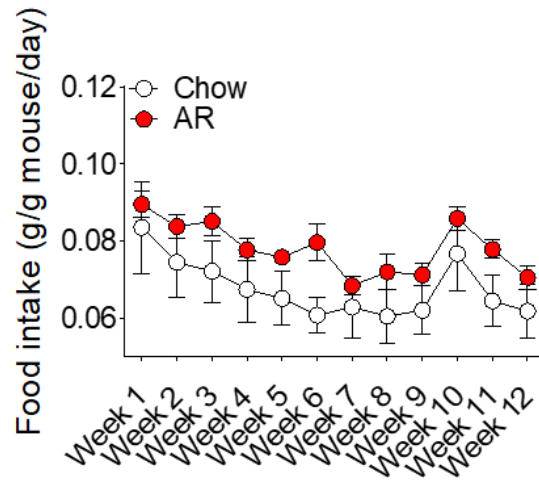

32

33 **Supplementary Figure 2. Food intake measurement in C57BL/6 mice during AR exposure**

34 **via normal chow diet for 12 weeks.** Diet was freshly replaced every week and consumption rate

35 was measured. **a** Food intake represented in g per mouse per day. **b** Food intake is represented in

36 g per g of mouse per day. Data are expressed as mean  $\pm$  SEM (n = 9 for Chow; n = 13 for AR).

37 Source data are provided as a Source Data File.

a

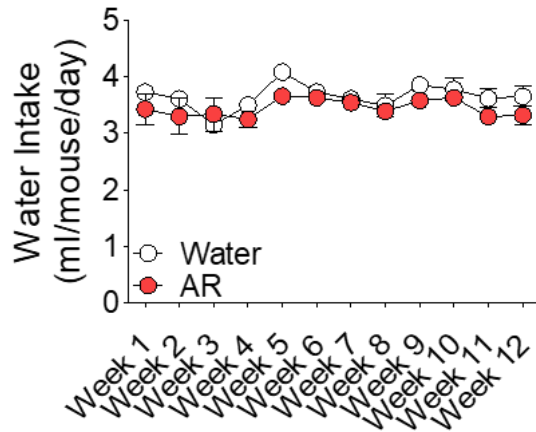

b

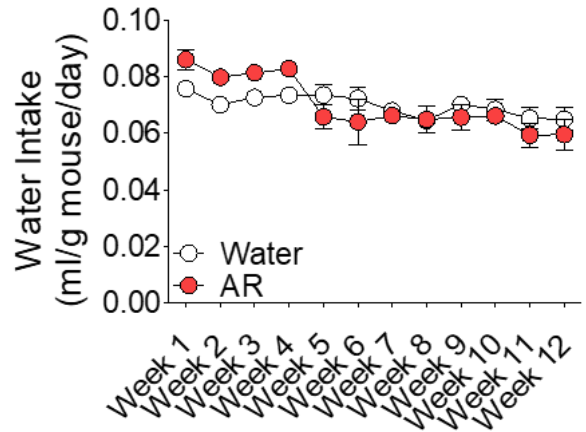

38

39 **Supplementary Figure 3. Water intake measurement in C57BL/6 mice during AR exposure**

40 **via normal drinking water for 12 weeks.** Drinking water was freshly replaced every week and

41 consumption rate was measured. **a** Water intake represented in ml per mouse per day. **b** Water

42 intake is represented in ml per g of mouse per day. Data are expressed as mean  $\pm$  SEM (n = 10 for

43 Water; n = 14 for AR). Source data are provided as a Source Data File.

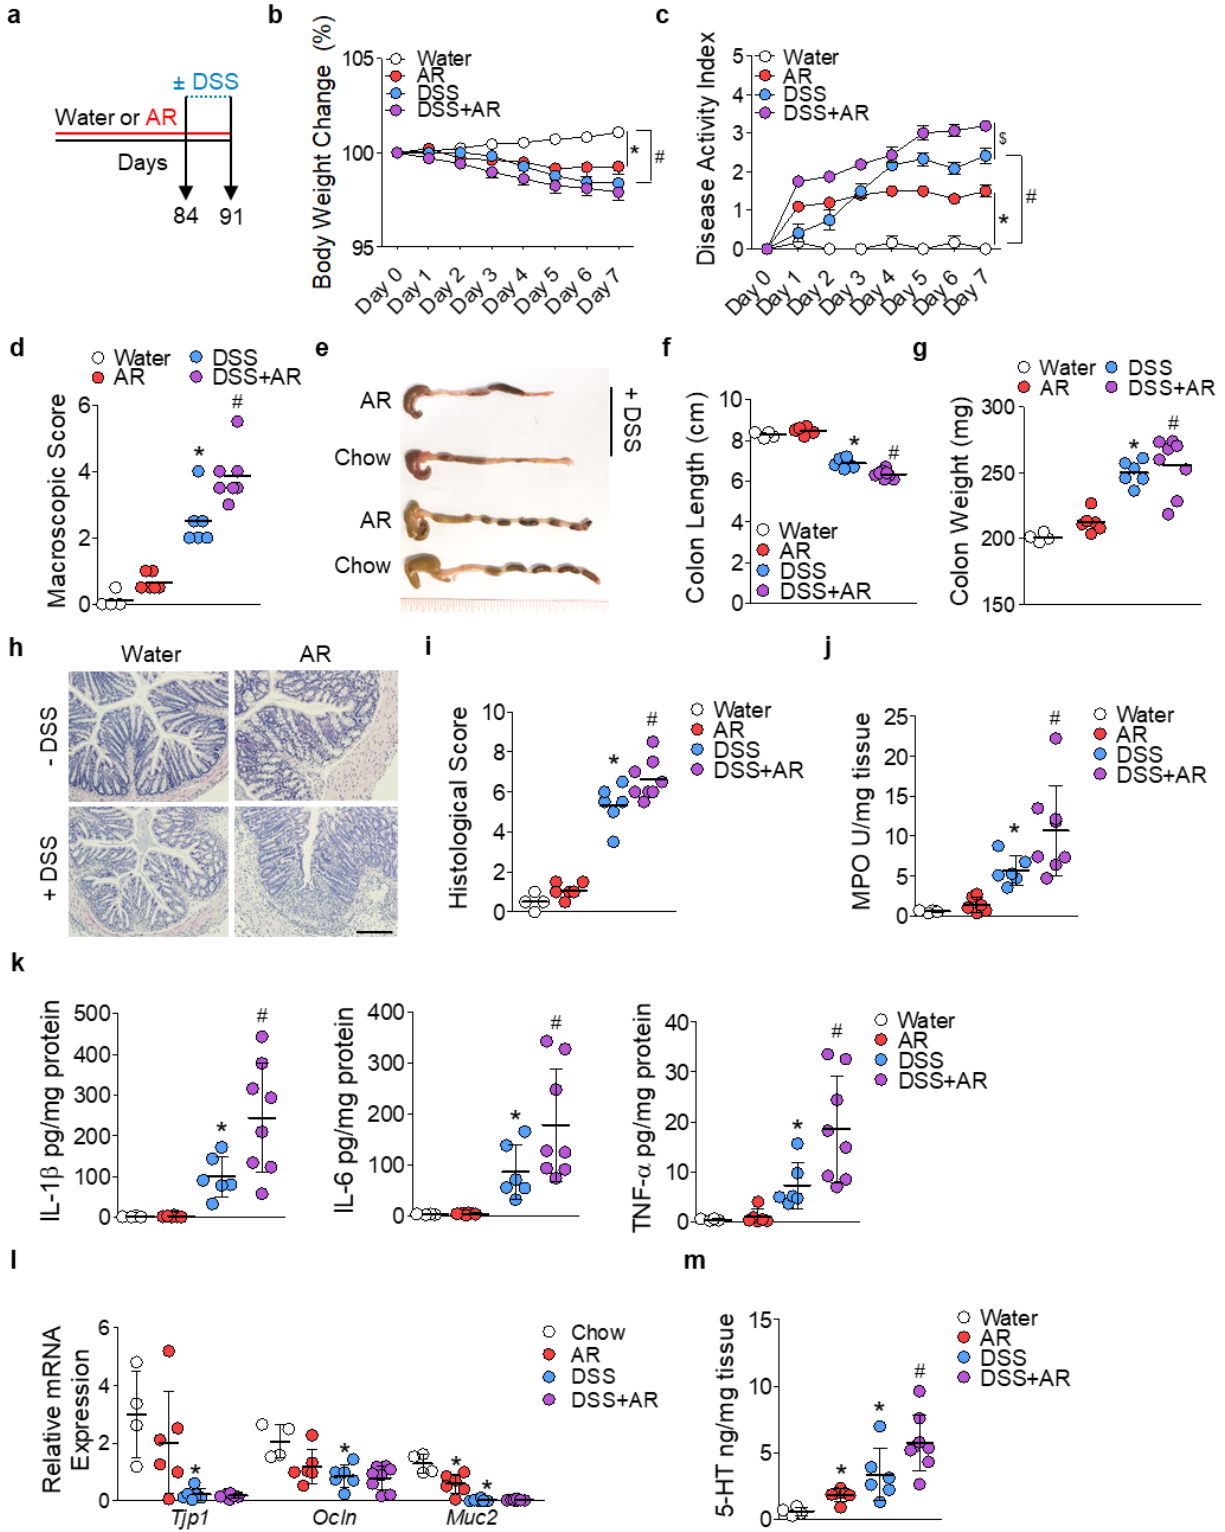

45 **Supplementary Figure 4. AR exposure via normal drinking water exacerbates the**  
46 **development of DSS-induced colitis in C57BL/6 mice.** C57BL/6 mice were either received  
47 normal drinking water or exposed to 100 ppm AR via water for 12 weeks (84 days) prior to  
48 induction of acute colitis by 3.5% DSS for 7 days. During DSS, mice were continuously exposed  
49 to AR. **a** Schematic illustration of the experimental design. **b** Body weight change during DSS. **c**  
50 Disease activity index (DAI) during DSS. **d** Macroscopic score. **e** A representative image of colons.  
51 **f** Colon length (cm). **g** Colon weight (mg). **h** Representative images of H&E-stained colon sections  
52 on day 7 post-DSS; scale bar: 100  $\mu$ m. **i** Histological score. **j** Colonic MPO levels. **k** Colonic IL-  
53  $1\beta$ , IL-6, and TNF- $\alpha$  levels. **l** Relative mRNA expression of intestinal epithelial barrier function  
54 related genes. **m** Colonic 5-HT level. **b** and **c** Data were analyzed by two-way ANOVA with *post*  
55 *hoc* Bonferroni's test and are expressed as mean  $\pm$  SEM (n = 4 for Water; n = 6 for AR, and DSS;  
56 n = 8 for DSS+AR). **d–m** Data were analyzed by one-way ANOVA with *post hoc* Bonferroni's  
57 test and are expressed as mean or mean  $\pm$  SD (n = 4 for Water; n = 6 for AR, and DSS; n = 8 for  
58 DSS+AR). Significance denoted by \*p < 0.05, #p < 0.05, where \*p < 0.05 versus Water, and #p <  
59 0.05 versus DSS. Source data are provided as a Source Data File.

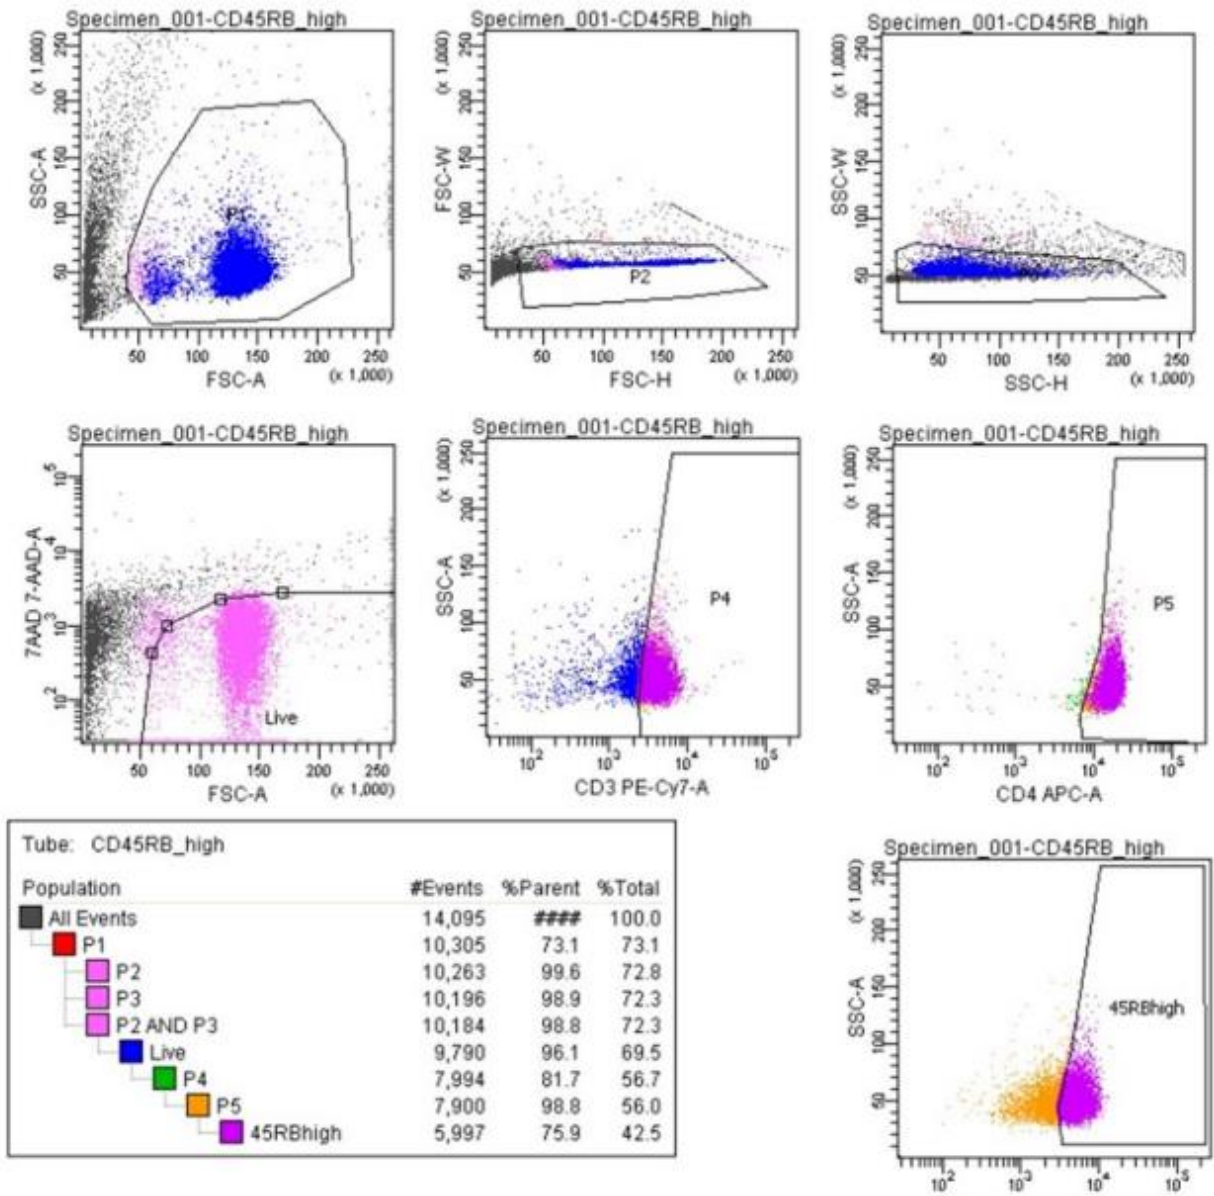

60

61 **Supplementary Figure 5. Sorting strategy of CD4<sup>+</sup>CD45RB<sup>hi</sup> T cells.** Naïve CD4<sup>+</sup> T cells were

62 stained with antibody cocktail containing anti-CD3-PE-Cy7, anti-CD4-APC, and anti-CD45RB-

63 FITC antibodies, and CD4<sup>+</sup>CD45RB<sup>hi</sup> cells were gated as above.

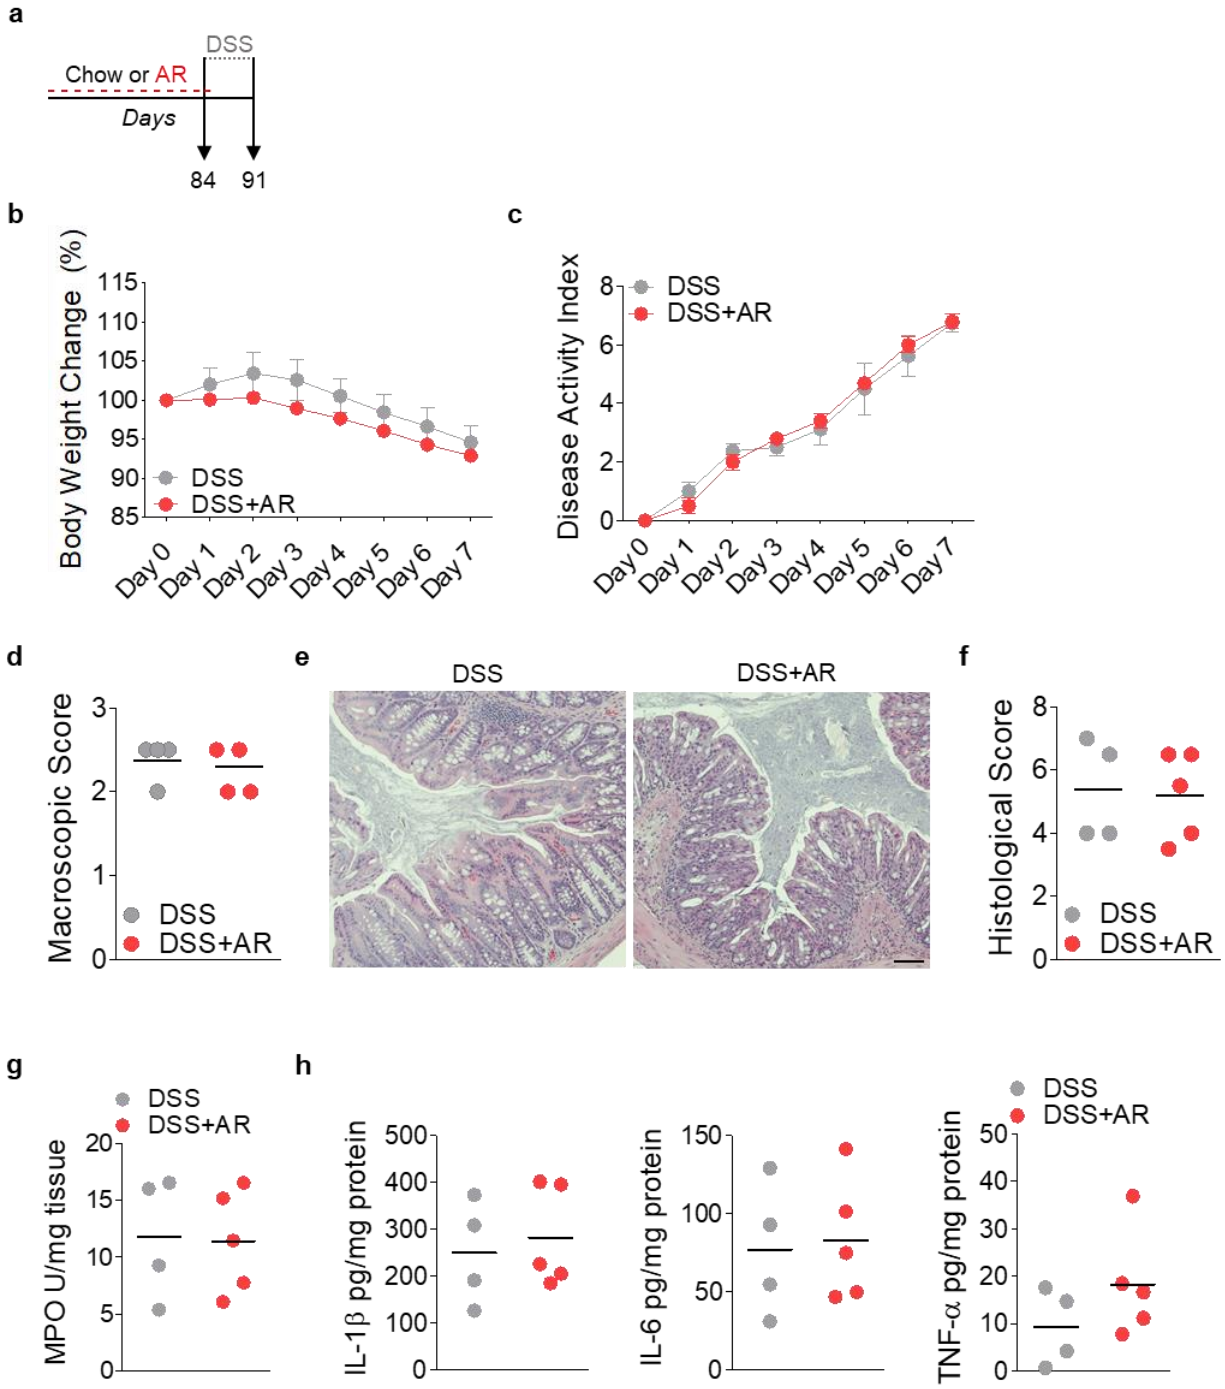



65 **Supplementary Figure 6. Intermittent exposure of AR does not enhance susceptibility to**  
66 **DSS-induced colitis in C57BL/6 mice.** C57BL/6 mice were either fed normal chow diet or  
67 intermittently exposed to 100 ppm AR via diet for one day per week for 12 weeks (84 days) prior  
68 to induction of acute colitis with 3.5% DSS for 7 days. Mice were only exposed to AR on the first  
69 day of DSS. **a** Schematic illustration of the experimental design. **b** Body weight changes during  
70 DSS. **c** Disease activity index (DAI) during DSS. **d** Macroscopic score. **e** Representative images  
71 of H&E-stained colon sections on day 7 post-DSS; scale bar: 100  $\mu$ m. **f** Histological score. **g**  
72 Colonic MPO levels. **h** Colonic IL-1 $\beta$ , IL-6, and TNF- $\alpha$  levels. **b** and **c** Data were analyzed by  
73 two-way ANOVA with *post hoc* Bonferroni's test and are expressed as mean  $\pm$  SEM (n = 4 for  
74 DSS; n = 5 for DSS+AR). **d–h** Data were analyzed by two-tailed unpaired Student's *t*-test and are  
75 expressed as mean or mean  $\pm$  SD (n = 4 for DSS; n = 5 for DSS+AR). Source data are provided as  
76 a Source Data File.

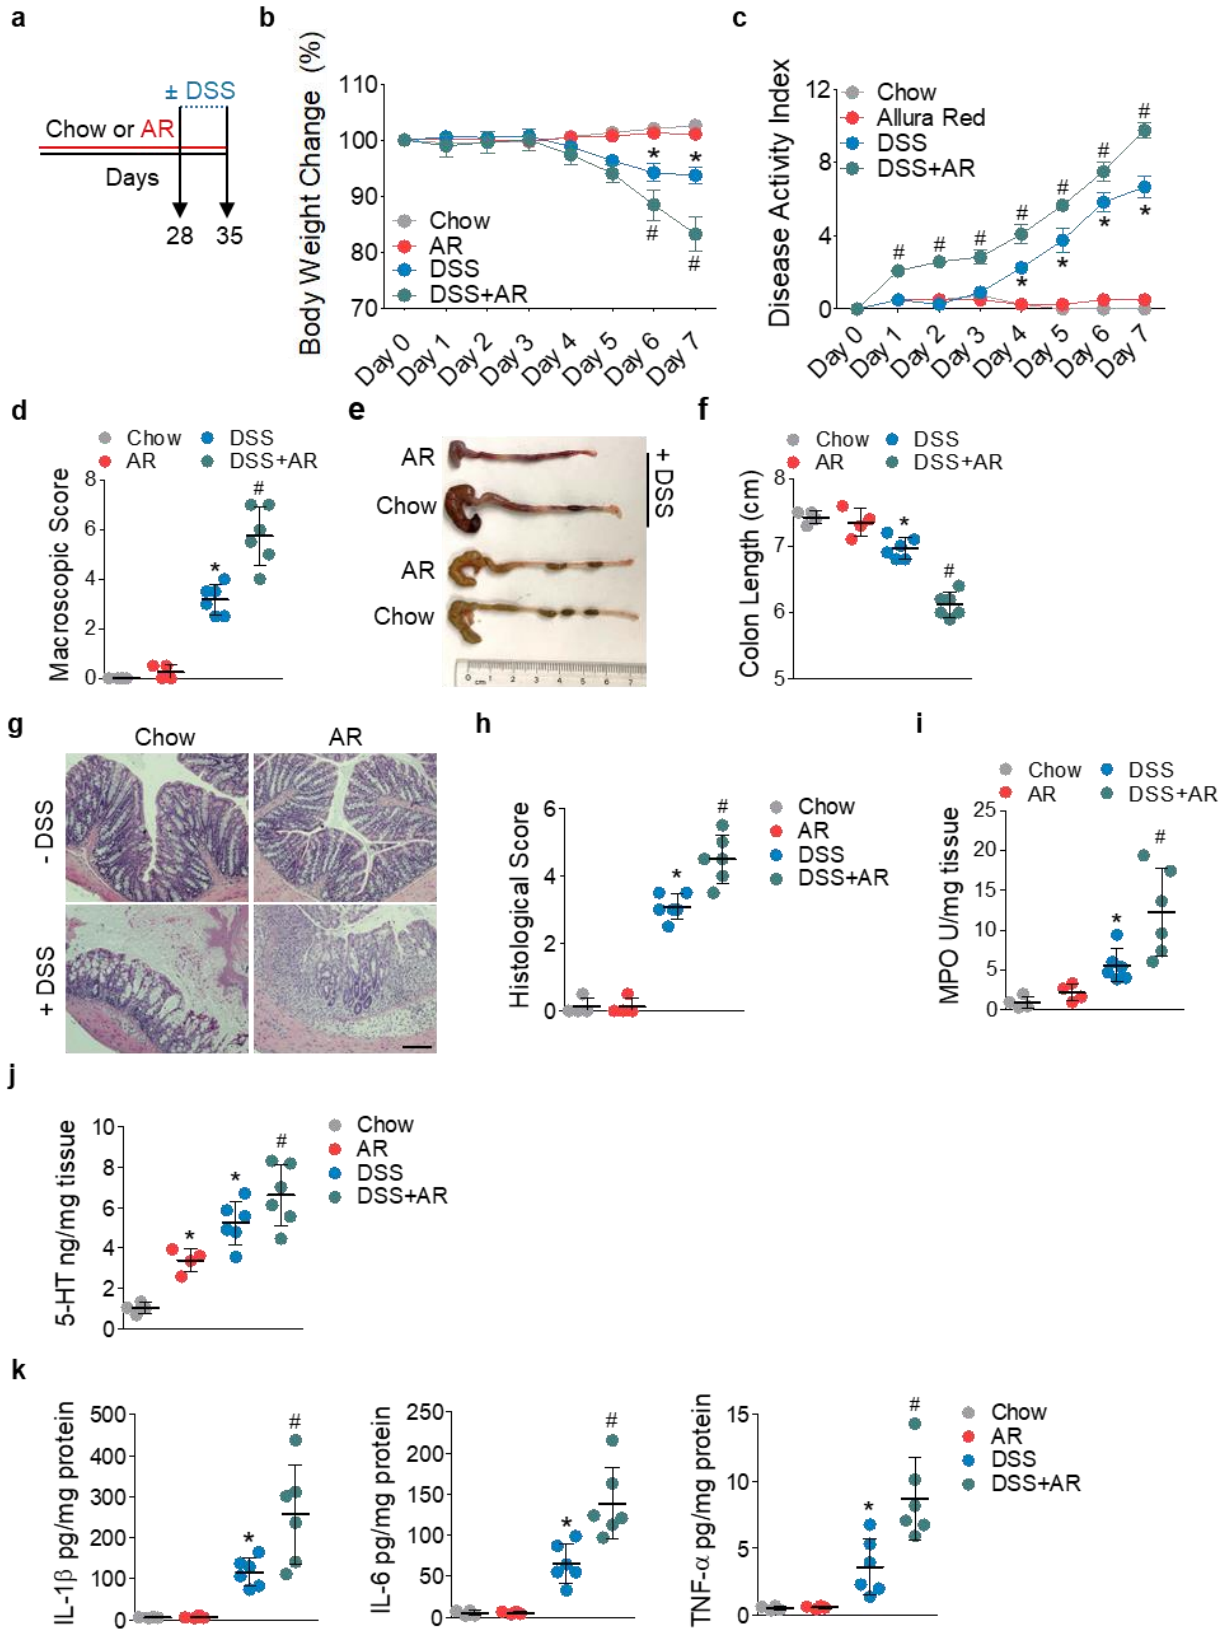

78 **Supplementary Figure 7. AR exposure during early life increases the susceptibility to DSS-**  
79 **induced colitis in later life.** Four-week-old C57BL/6 mice were either fed normal chow diet or  
80 exposed to 100 ppm AR via diet for 4 weeks (28 days) prior to induction of acute colitis by 3.5%  
81 DSS for 7 days. During DSS, mice were not exposed to AR, but fed normal chow diet. **a** Schematic  
82 illustration of the experimental design. **b** Body weight changes during DSS. **c** Disease activity  
83 index (DAI) during DSS. **d** Macroscopic score. **e** A representative image of colons. **f** Colonic  
84 length (cm). **g** Representative images of H&E-stained colon sections on day 7 post-DSS; scale bar:  
85 100  $\mu$ m. **h** Histological score. **i** Colonic MPO levels. **j** Colonic 5-HT levels. **k** Colonic IL-1 $\beta$ , IL-  
86 6, and TNF- $\alpha$  levels. **b** and **c** Data were analyzed by two-way ANOVA with *post hoc* Bonferroni's  
87 test and are expressed as mean  $\pm$  SEM (n = 4 for Chow, and AR; n = 6 for DSS, and DSS+AR).  
88 **d–k** Data were analyzed by one-way ANOVA with *post hoc* Bonferroni's test and are expressed  
89 as mean or mean  $\pm$  SD (n = 4 for Chow, and AR; n = 6 for DSS, and DSS+AR). Significance  
90 denoted by \*p < 0.05, #p < 0.05, where \*p < 0.05 versus Chow, and #P < 0.05 versus DSS. Source  
91 data are provided as a Source Data File.

a

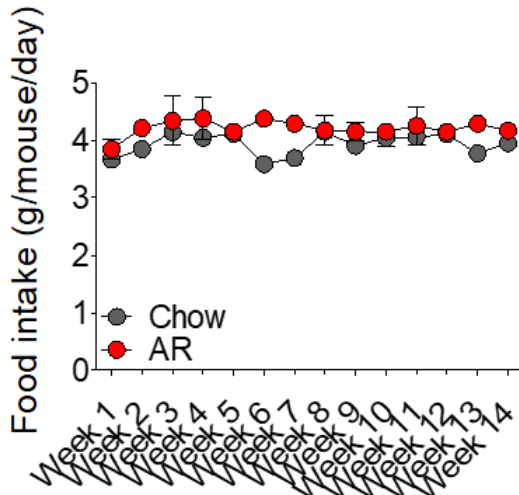

b

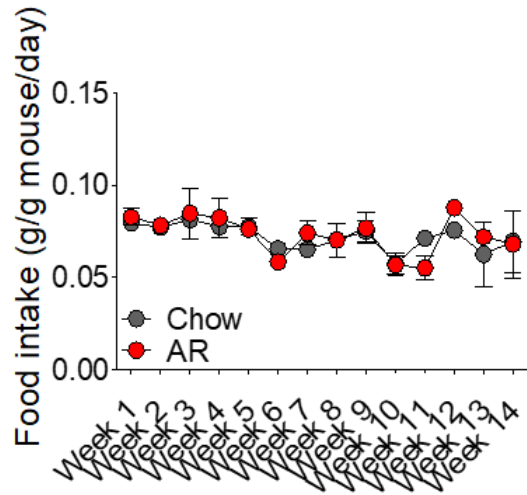

92

93 **Supplementary Figure 8. Food intake measurement in naïve C57BL/6 mice exposed to AR**

94 **via normal chow diet for 14 weeks.** Diet was freshly replaced every week and consumption rate

95 was measured. **a** Food intake represented in g per mouse per day. **b** Food intake is represented in

96 g per g of mouse per day. Data are expressed as mean  $\pm$  SEM (n = 4 for Chow; n = 5 for AR).

97 Source data are provided as a Source Data File.

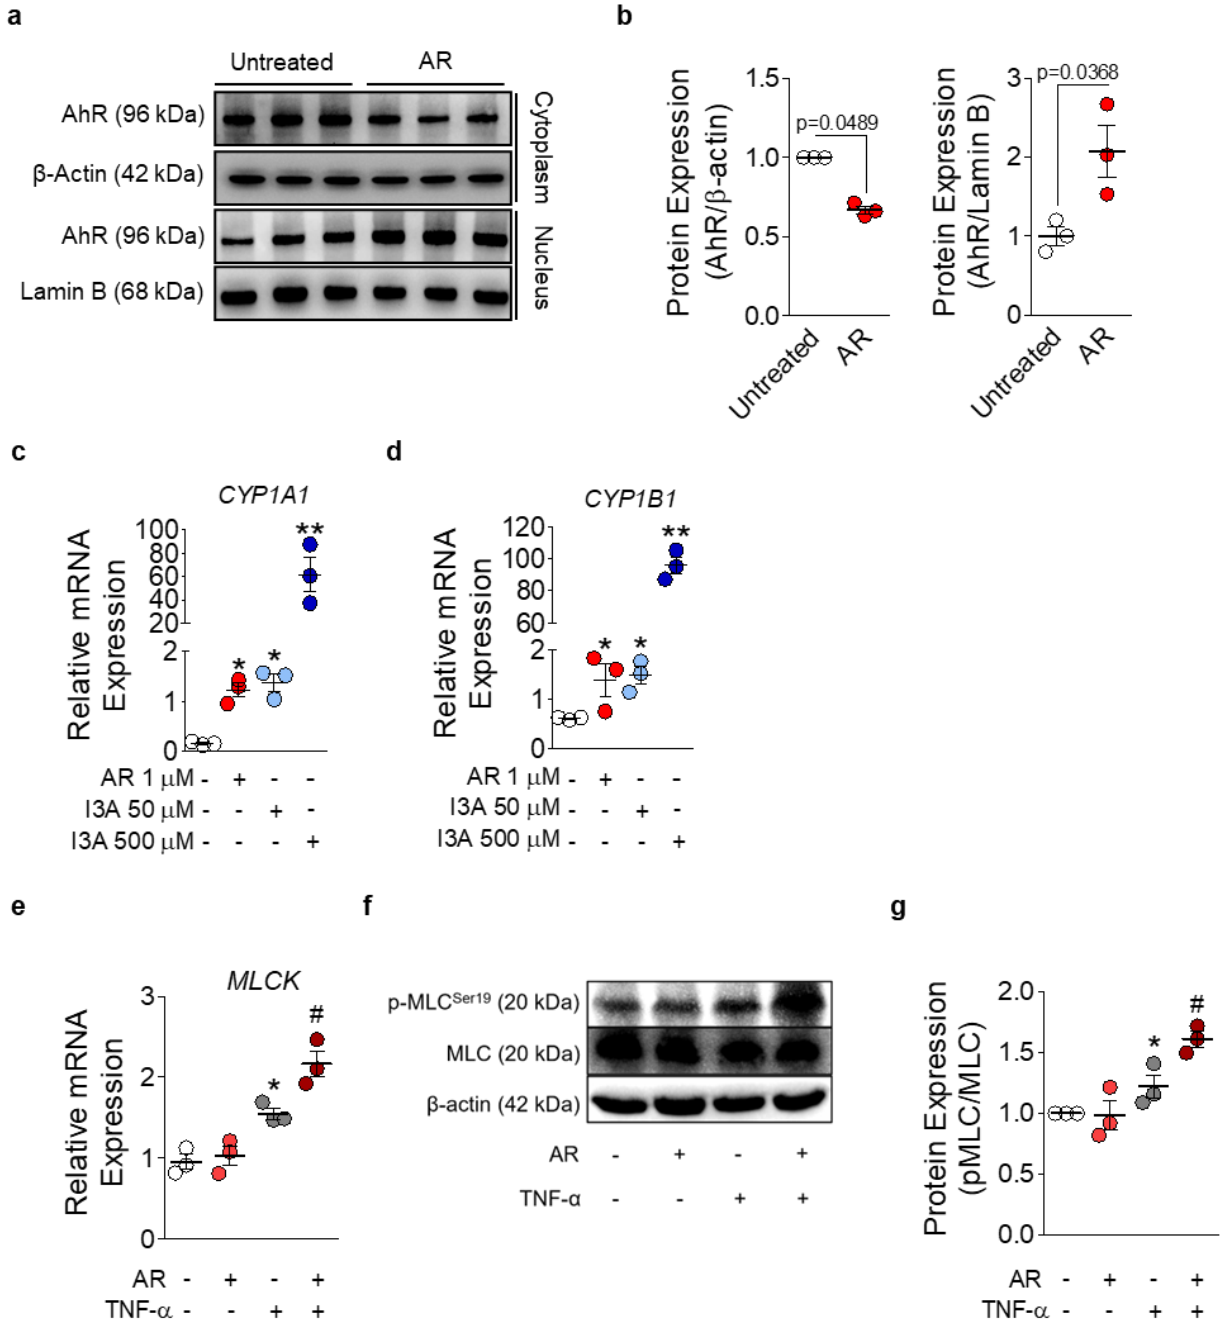

99 **Supplementary Figure 9. AR up-regulates *CYP1A1/CYP1B1* mRNA expression and activates**  
100 **MLCK pathway in HT-29 cells.** HT-29 cells were treated for 24 hours with AR (1  $\mu\text{mol L}^{-1}$ ).  
101 Indole-3-carboxaldehyde (I3A) was used as a positive control. In another experiment, HT-29 cells  
102 were pre-treated for 1 hour with TNF- $\alpha$  (10 ng  $\text{mL}^{-1}$ ), followed by 24 hours of AR treatment. **a**  
103 Representative western blot analysis of nuclear translocation of AhR.  $\beta$ -actin was used for  
104 quantifying cytoplasmic proteins. Lamin B was used for quantifying nuclear proteins. Uncropped  
105 blots are provided in the Supplementary Figure 17. **b** Relative density of nuclear and cytoplasmic  
106 AhR. **c** *CYP1A1* mRNA levels. **d** *CYP1B1* mRNA levels. **e** *MLCK* mRNA levels. **f** Representative  
107 western blot analysis of pMLC<sup>Ser19</sup>, MLC and  $\beta$ -actin. Uncropped blots are provided in the  
108 Supplementary Figure 17. **g** Relative density of pMLC<sup>Ser19</sup>/MLC. **b** Data were analyzed by two-  
109 tailed unpaired Student's *t*-test and are expressed as mean  $\pm$  SEM of 3 independent experiments  
110 ( $n = 3$ ). **c–d** Data were analyzed by one-way ANOVA with *post hoc* Dunnett's test and are  
111 expressed as mean  $\pm$  SEM of 3 independent experiments ( $n = 3$ ) **e–g** Data were analyzed by one-  
112 way ANOVA with *post hoc* Bonferroni's test and are expressed as mean  $\pm$  SEM of 3 independent  
113 experiments ( $n = 3$ ). Significance denoted by \* $p < 0.05$ , # $p < 0.05$  unless otherwise provided. \* $p <$   
114  $0.05$  versus untreated, and # $p < 0.05$  versus TNF- $\alpha$ . Source data are provided as a Source Data File.

**a**

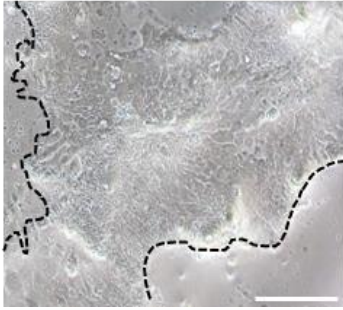

**b**

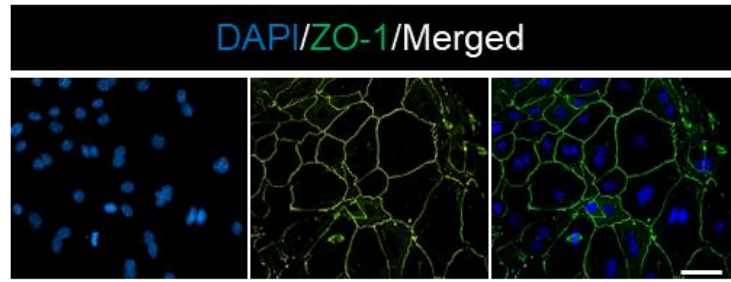

116 **Supplementary Figure 10. A functional 2D monolayer derived from murine colonic**  
117 **organoids. a** A representative brightfield image of 2D monolayer derived from murine colonic  
118 organoids. **b** Representative immunofluorescence images of a functional 2D monolayer stained for  
119 ZO-1 (green) and DAPI (blue). Scale bar: 50  $\mu\text{m}$ . Data are representative of 2 independent  
120 experiments (n = 2).



a

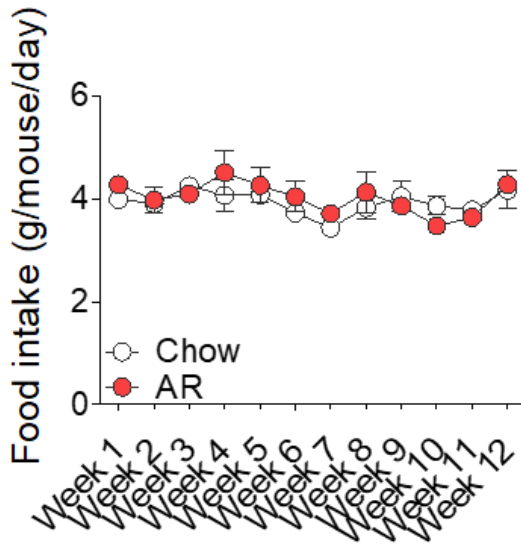

b

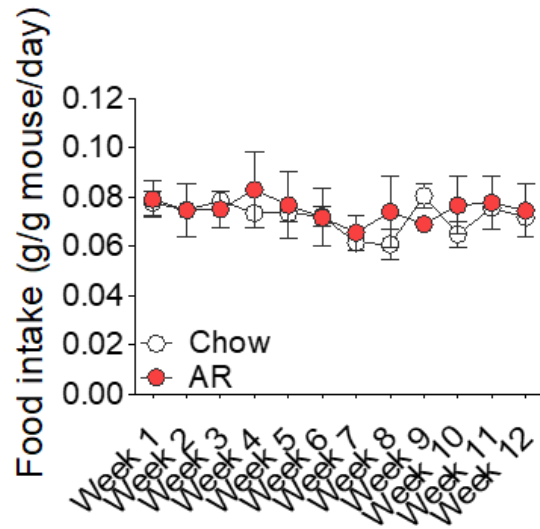

121

122 **Supplementary Figure 11. Food intake measurement in Tph1-deficient mice exposed to AR**

123 **via normal chow diet for 12 weeks.** Diet was freshly replaced every week and consumption rate

124 was measured. **a** Food intake represented in g per mouse per day. **b** Food intake is represented in

125 g per g of mouse per day. Data are expressed as mean  $\pm$  SEM (n = 8 for Chow; n = 9 for AR).

126 Source data are provided as a Source Data File.

a

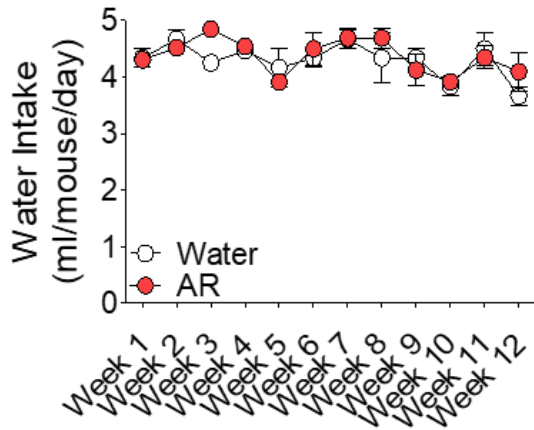

b

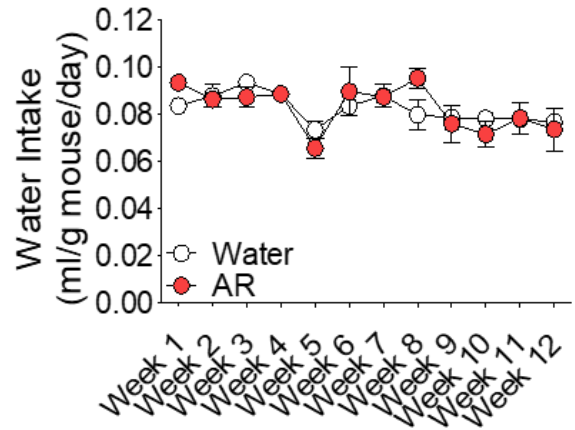

127

128 **Supplementary Figure 12. Water intake measurement in Tph1-deficient mice exposed to AR**

129 **via normal drinking water for 12 weeks.** Drinking water was freshly replaced every week and

130 consumption rate was measured. **a** Water intake represented in ml per mouse per day. **b** Water

131 intake is represented in ml per g of mouse per day. Data are expressed as mean  $\pm$  SEM (n = 8 for

132 Chow; n = 8 for AR). Source data are provided as a Source Data File.

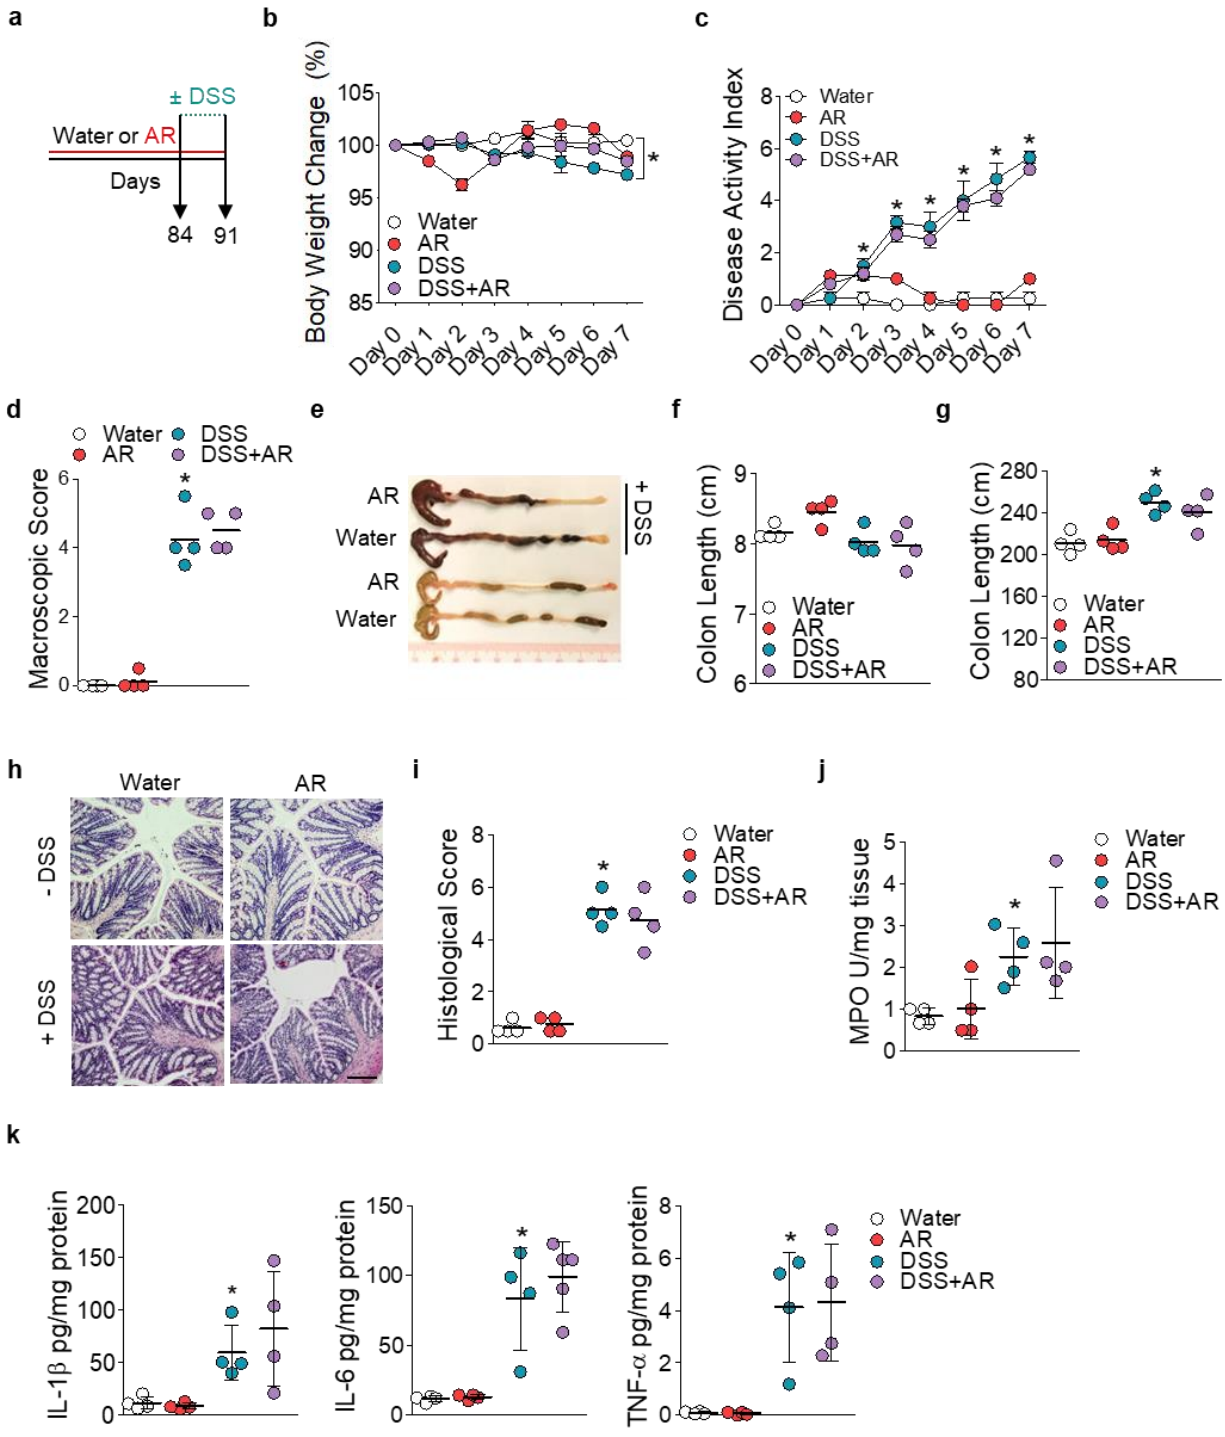

134 **Supplementary Figure 13. AR exposure via normal drinking water does not exacerbate DSS-**  
135 **induced colitis in Tph1-deficient mice.** *Tph1*<sup>-/-</sup> mice were either received normal drinking water  
136 or exposed to 100 ppm AR via normal drinking water for 12 weeks (84 days) prior to induction of  
137 acute colitis by 3.5% DSS for 7 days. During DSS, mice were continuously exposed to AR. **a**  
138 Schematic illustration of the experimental design. **b** Body weight change during DSS. **c** Disease  
139 activity index (DAI) during DSS. **d** Macroscopic score. **e** A representative image of colons. **f** Colon  
140 length (cm). **g** Colon weight (mg). **h** Representative images of H&E-stained colon sections on day  
141 7 post-DSS; scale bar: 100  $\mu$ m. **i** Histological score. **j** Colonic MPO levels. **k** Colonic IL-1 $\beta$ , IL-  
142 6, and TNF- $\alpha$  levels. **b** and **c** Data were analyzed by two-way ANOVA with *post hoc* Bonferroni's  
143 test and are expressed as mean  $\pm$  SEM (n = 4 per group). **d–k** Data were analyzed by one-way  
144 ANOVA with *post hoc* Bonferroni's test and are expressed as mean or mean  $\pm$  SD (n = 4 per  
145 group). Significance denoted by \*p < 0.05, where \*p < 0.05 versus Water. Source data are provided  
146 as a Source Data File.

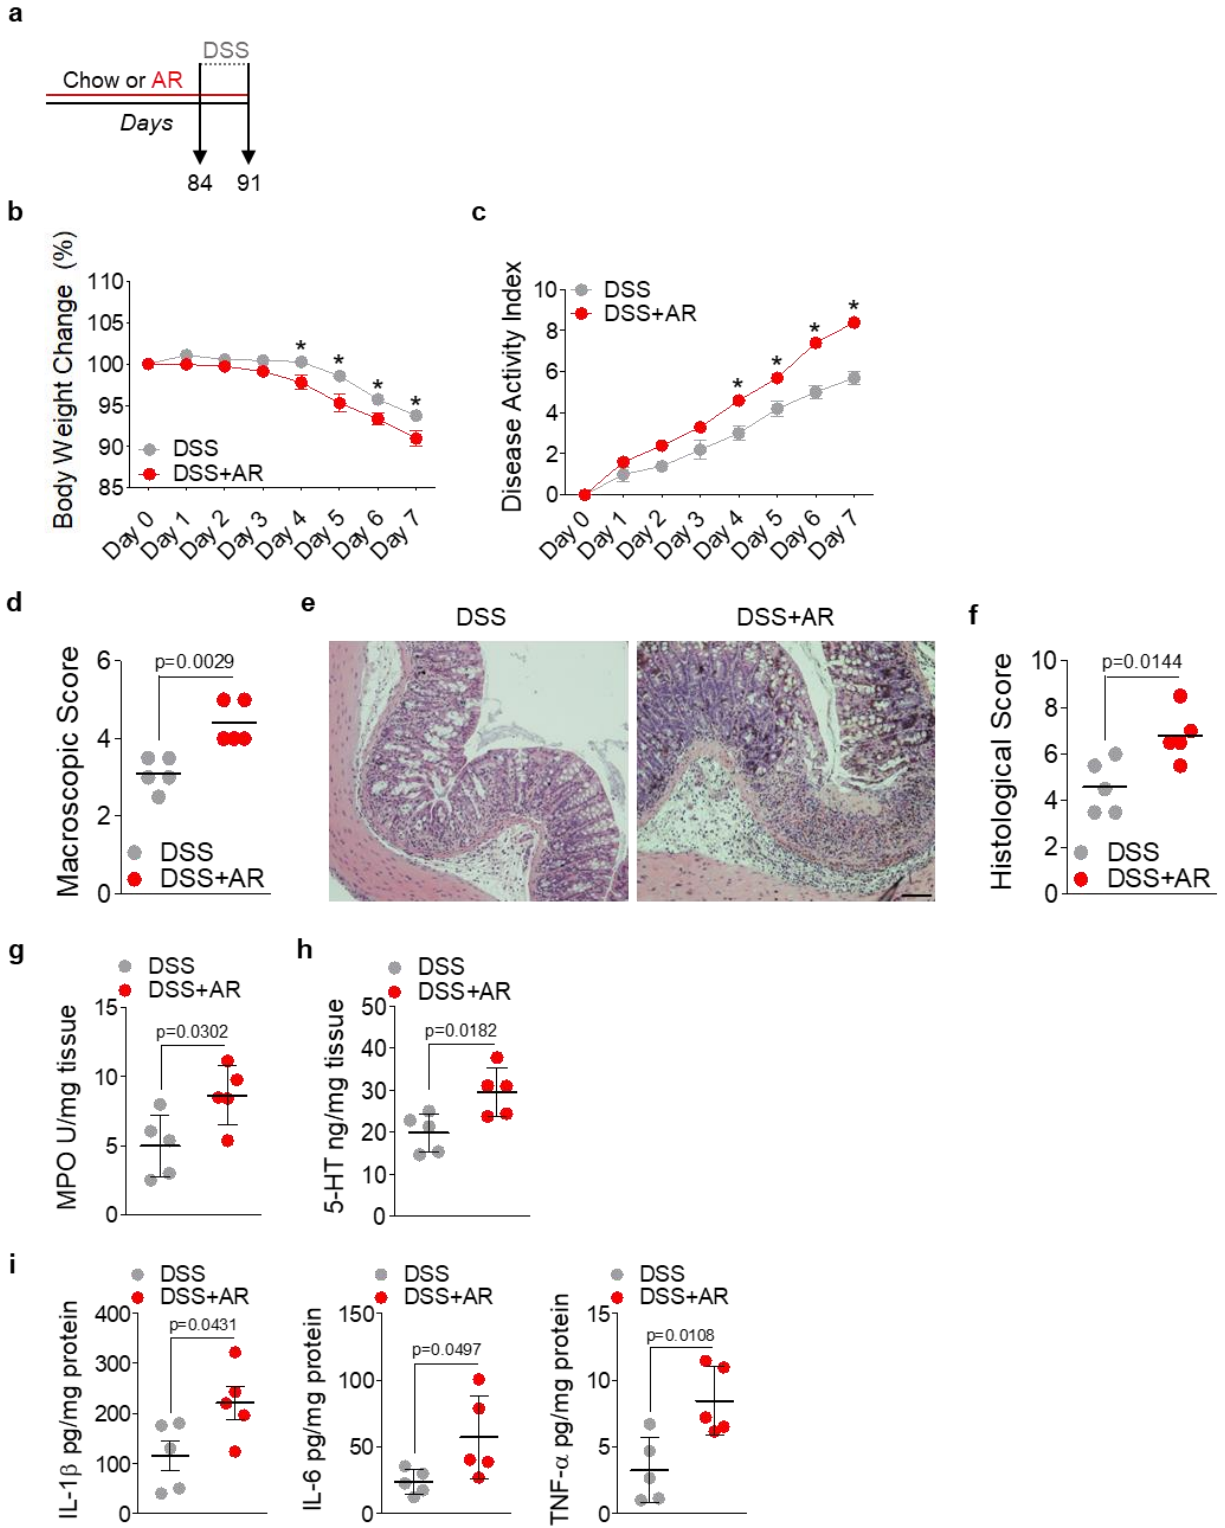

148 **Supplementary Figure 14. Exposing SERT-deficient mice to AR exacerbates the**  
149 **development of DSS-induced colitis.** C57BL/6 mice were either fed normal chow diet or exposed  
150 to 100 ppm AR via diet for 12 weeks (84 days) prior to induction of acute colitis by 3.5% DSS for  
151 7 days. During DSS, mice were continuously exposed to AR. **a** Schematic illustration of the  
152 experimental design. **b** Body weight change during DSS. **c** Disease activity index (DAI) during  
153 DSS. **d** Macroscopic score. **e** Representative images of H&E-stained colon sections on day 7 post-  
154 DSS; scale bar: 100  $\mu\text{m}$ . **f** Histological score. **g** Colonic MPO levels. **h** Colonic 5-HT levels. **i**  
155 Colonic IL-1 $\beta$ , IL-6, and TNF- $\alpha$  levels. **b** and **c** Data were analyzed by two-way ANOVA with  
156 *post hoc* Bonferroni's test and are expressed as mean  $\pm$  SEM (n = 5 per group). **d–i** Data were  
157 analyzed by two-tailed unpaired Student's *t*-test and are expressed as mean or mean  $\pm$  SD (n = 5  
158 per group). Significance denoted by \* $p < 0.05$  unless otherwise provided, where \* $p < 0.05$  versus  
159 DSS. Source data are provided as a Source Data File.

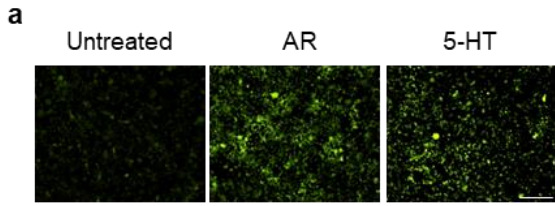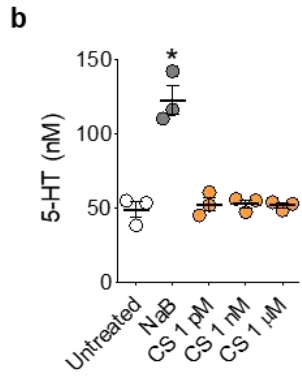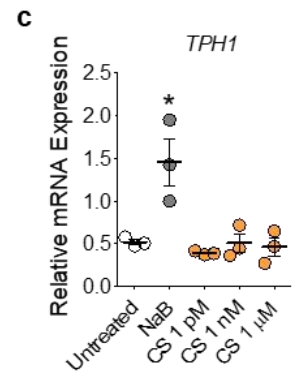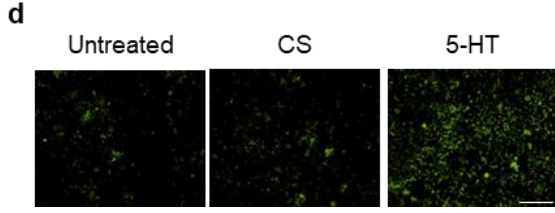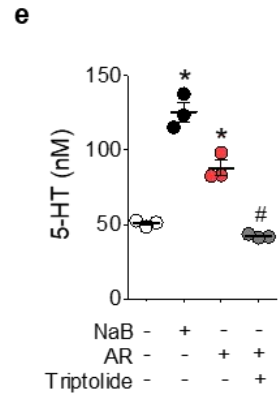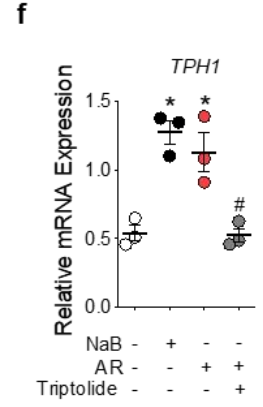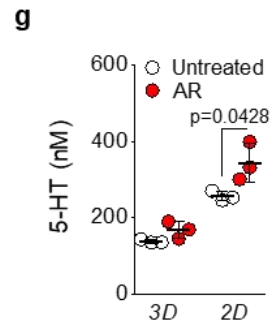

161 **Supplementary Figure 15. AR, but not CS, induces ROS generation via NF-κB and increases**  
162 **5-HT secretion in BON cells, and increases 5-HT secretion in murine colonic organoid-**  
163 **derived 2D monolayer. a** Representative fluorescence images of intracellular reactive oxygen  
164 species (ROS) detected using 2',7'-dichlorofluorescein diacetate (DCF-DA) in BON cells treated  
165 for 24 hours with AR (1 μmol L<sup>-1</sup>) or 5-HT (10 μmol L<sup>-1</sup>). 5-HT was used as a positive control for  
166 ROS induction; scale bar: 50 μm. Data are representative of 2 independent experiments (n = 2). **b**  
167 5-HT levels in the culture supernatant, and **c** *TPHI* mRNA levels, of BON cells treated for 24  
168 hours with three concentrations of *p*-Cresidinesulfonic acid (CS). NaB (1 mmol L<sup>-1</sup>) was used as  
169 positive control for 5-HT secretion. **d** Representative fluorescence images of intracellular ROS  
170 detected using DCF-DA in BON cells treated for 24 hours with CS (1 μmol L<sup>-1</sup>) or 5-HT (10 μmol  
171 L<sup>-1</sup>); scale bar: 50 μm. Data are representative of 2 independent experiments (n = 2). **e** 5-HT level  
172 in the culture supernatant, and **f** *TPHI* mRNA levels, of BON cells pre-treated for 1 hour with  
173 triptolide (20 nmol L<sup>-1</sup>), followed by 24 hours of AR treatment (1 μmol L<sup>-1</sup>). NaB (1 mmol L<sup>-1</sup>)  
174 was used as a positive control. **g** 5-HT levels in mouse colonic organoids and the 2D monolayer.  
175 **b** and **c** Data were analyzed by one-way ANOVA with *post hoc* Dunnett's test and are expressed  
176 as mean ± SEM of 3 independent experiments (n = 3). **e** and **f** Data were analyzed by one-way  
177 ANOVA with *post hoc* Bonferroni's test and are expressed as mean ± SEM of 3 independent  
178 experiments (n = 3). **g** Data were analyzed by two-tailed unpaired Student's *t*-test. Data are  
179 expressed as mean ± SD and representative of 2 independent experiments (n = 2). Significance  
180 denoted by \*p < 0.05, #p < 0.05 unless otherwise provided, where \*p < 0.05 versus Untreated, and  
181 #p < 0.05 versus AR. Source data are provided as a Source Data File.



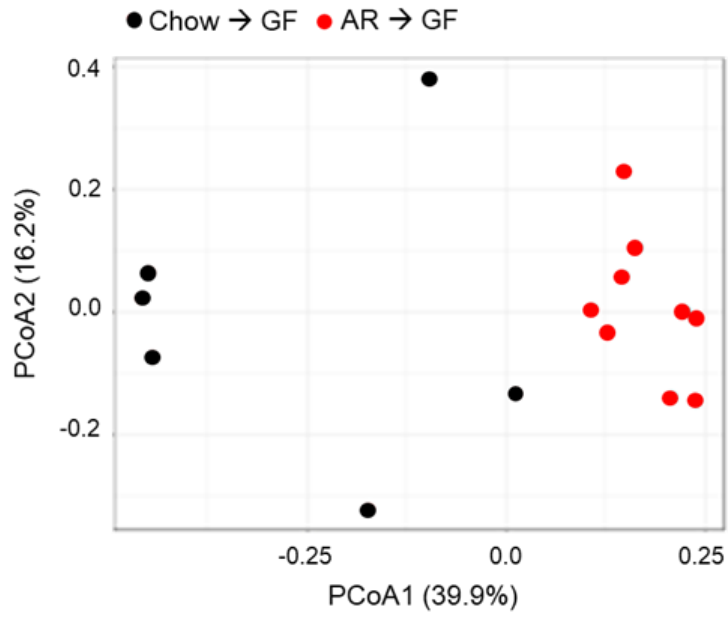

183 **Supplementary Figure 16. Bray-Curtis dissimilarity showing persistence of transplanted**  
184 **microbiota profiles after 21-day colonization in GF mice.** 16S rRNA bacterial profiling at the  
185 v3-v4 region using feces collected from the recipient GF mice on day 21 was carried out. Bray-  
186 Curtis dissimilarity revealed each group of mice (n = 6 for Chow → GF; n = 9 for AR → GF)  
187 possessed distinct microbiota as evidenced by two separate clustering pattern. Source data are  
188 provided as a Source Data File.

189 **Supplementary Table 1. qRT-PCR Mouse Primers**

|              | Forward (5'-3')          | Reverse (5'-3')          |
|--------------|--------------------------|--------------------------|
| <i>I8S</i>   | GTAACCCGTTGAACCCATT      | CCATCCAATCGGTAGTAGCG     |
| <i>Defb3</i> | GGATCCATTACCTTCTGTTTGC   | ATTTGAGGAAAGGAACTCCAC    |
| <i>Il22</i>  | TGTCCGGCTCATCGGGGAGA     | ACAGCAGGTCCAGTTCCCCA     |
| <i>Mlck</i>  | GCGTGATCAGCCTGTTCTTTCTAA | GCCCCATCTGCCCTTCTTTGACC  |
| <i>Muc2</i>  | CTGACCAAGAGCGAACACAA     | CATGACTGGAAGCAACTGGA     |
| <i>Ocln</i>  | ATGTCCGGCCGATGCTCTCTC    | CTTTGGCTGCTCTTGGGTCTGTAT |
| <i>Pparg</i> | CTGCTCAAGTATGGTGTCCATGA  | ATGAGGACTCCATCTTTATTCA   |
| <i>Reg3γ</i> | CCGTGCCTATGGCTCCTATTG    | GCACAGACACAAGATGTCCTG    |
| <i>Tjp1</i>  | ACCCGAAACTGCTGCTGTGGATAG | AAATGGCGGGCAGAACTTGTGTA  |

190

191 **Supplementary Table 2. qRT-PCR Human Primers**

|               | Forward (5'-3')         | Reverse (5'-3')         |
|---------------|-------------------------|-------------------------|
| <i>I8S</i>    | TCCACAGGAGGCCTACACGCC   | TTTCCGCCGCCCATCGATGTT   |
| <i>CYP1A1</i> | GGTCAAGGAGCACTACAAAACC  | TGGACATTGGCGTTCTCAT     |
| <i>CYP1B1</i> | CACTGACATCTTCGGCG       | ACCTGATCCAATTCTGCCTG    |
| <i>MLCK</i>   | AGGCCAAGGACTTTGTTTCC    | TTCAGCCACTCGTGTTTCAG    |
| <i>TPH1</i>   | TGCCCTTGCTAAGTTCAGCAGGA | AGCAAGAGATGGCCCAGACCTCC |

192

193 **Supplementary Figure 17. Uncropped blots**

194 Uncropped blots in Supplementary Figure 9a.

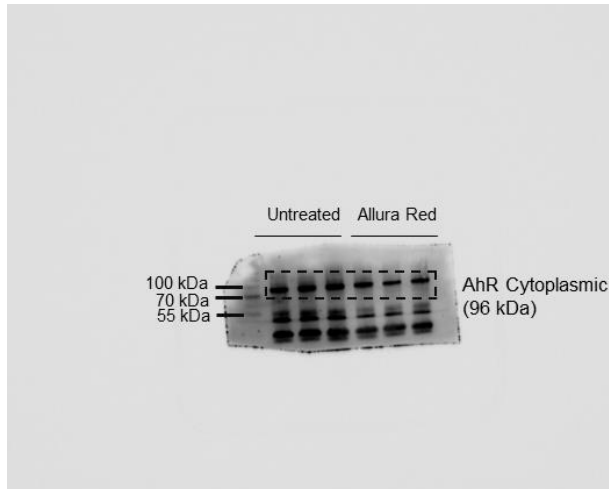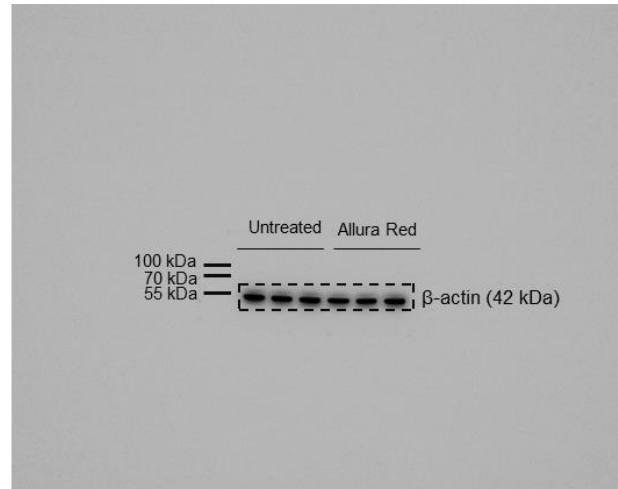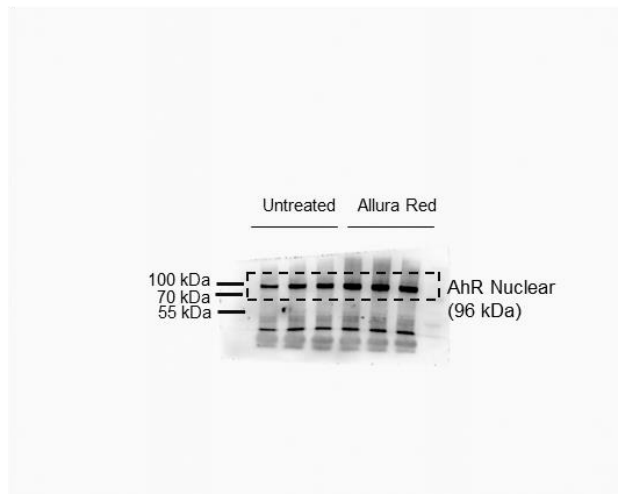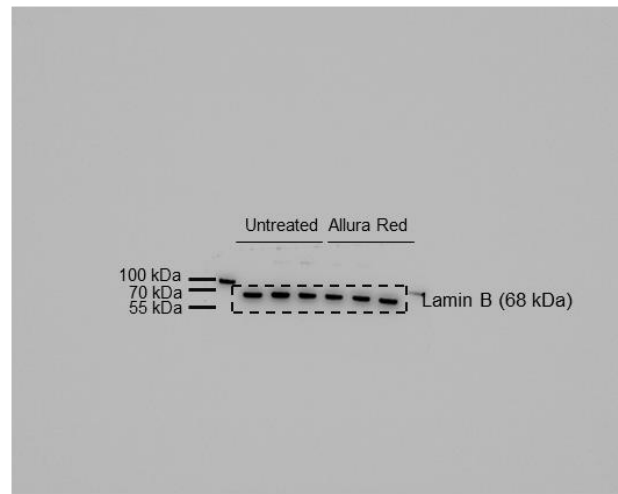

195

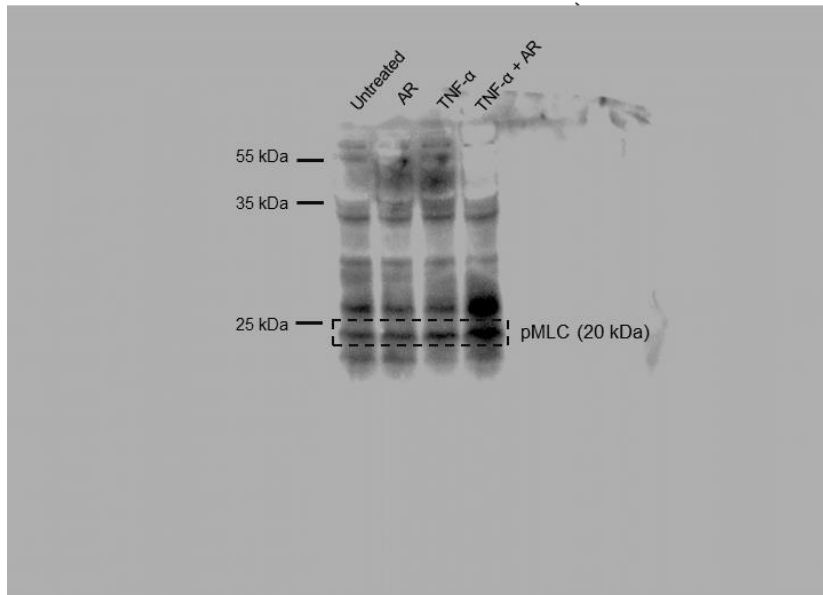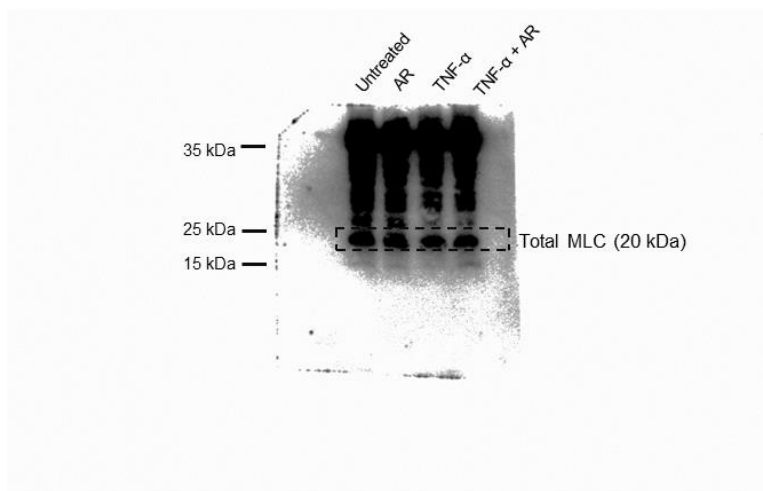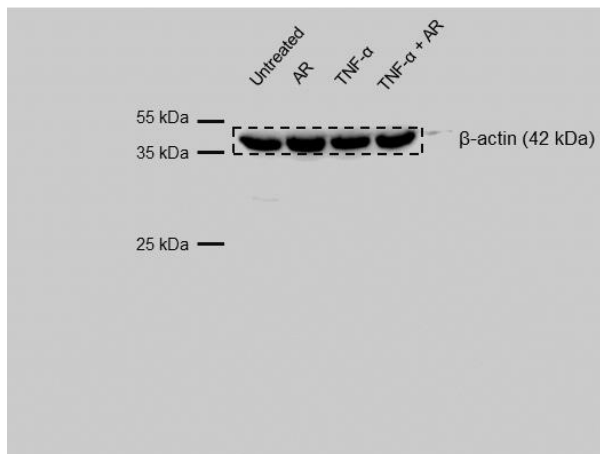

Supplement: 41467_2022_35309_MOESM1_ESM.pdf [file 41467_2022_35309_MOESM1_ESM.pdf]
